# Supplementary material for: Ferroptosis, a new target for treatment of renal injury and fibrosis in a 5/6 nephrectomy-induced CKD rat model
Source: PubMed Central journal article supplement (PMC8941123; doi:10.1038/s41420-022-00931-8), 2022-03-22

GPX4

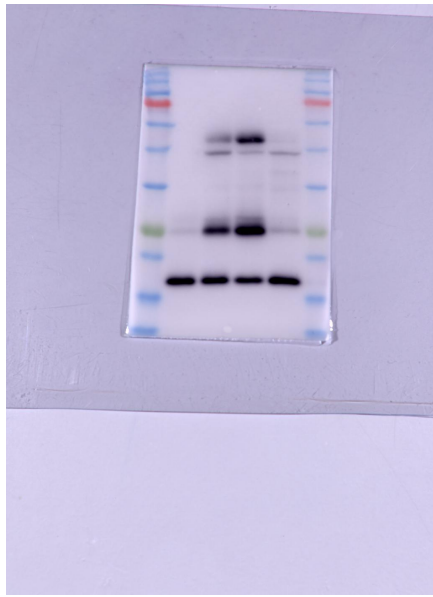

ACSL4

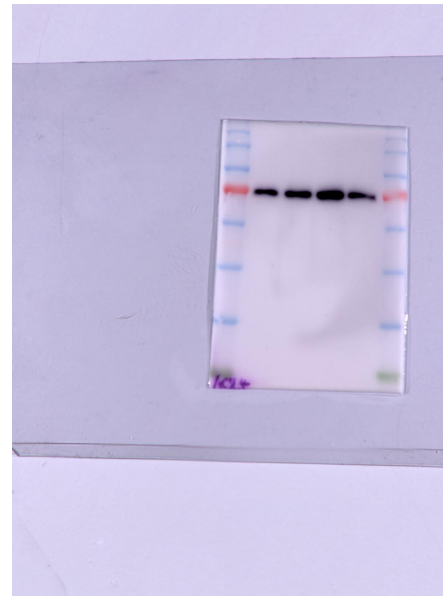

GAP

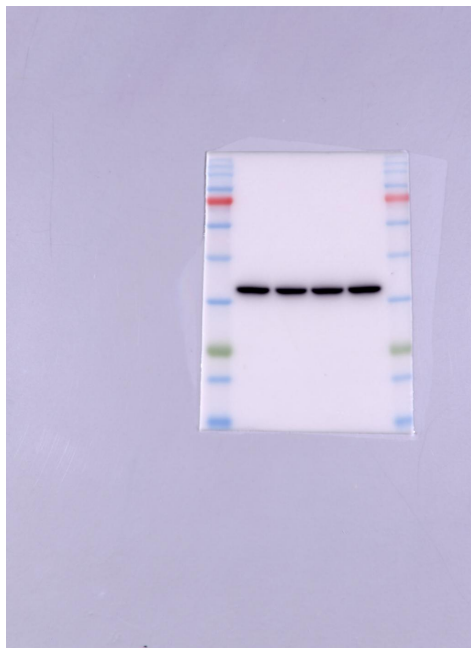

Cleaved-caspase3

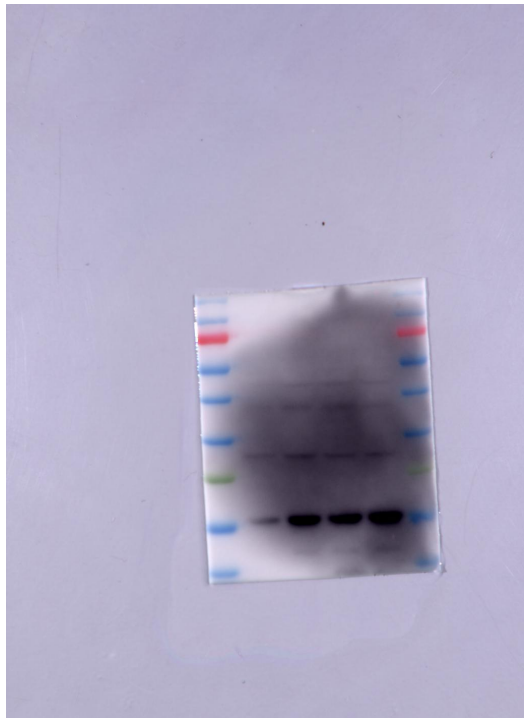

Bcl-2

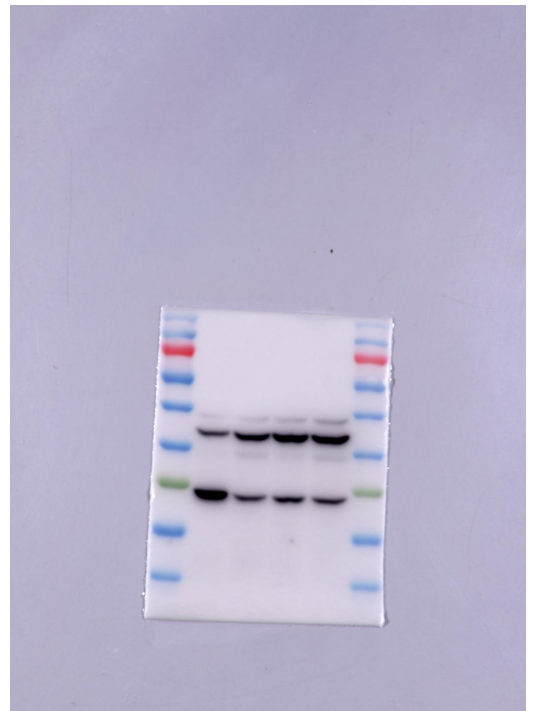

Bax

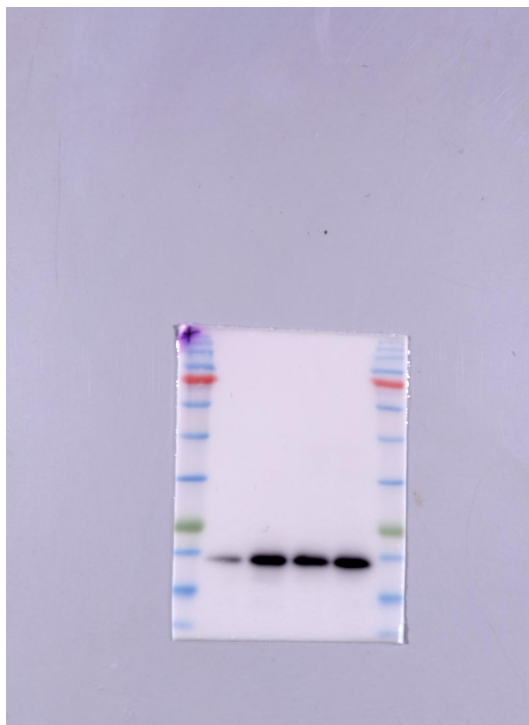

GAP

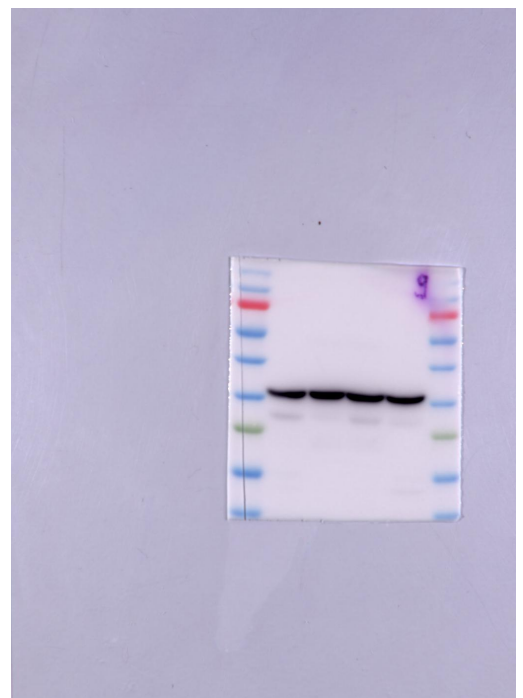

HO-1

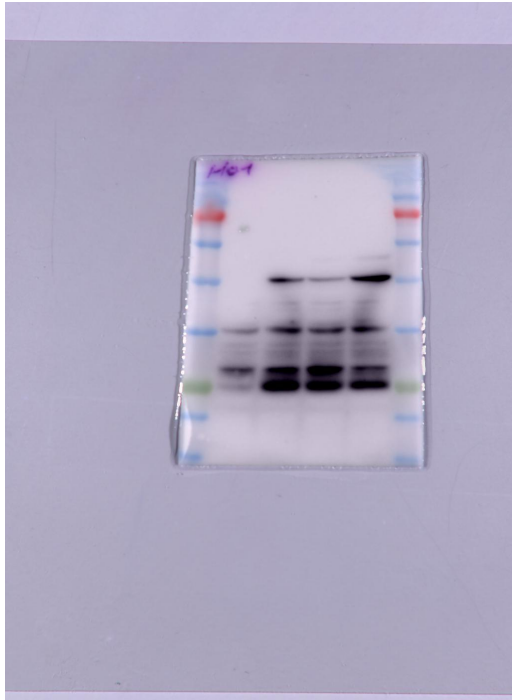

DMT1

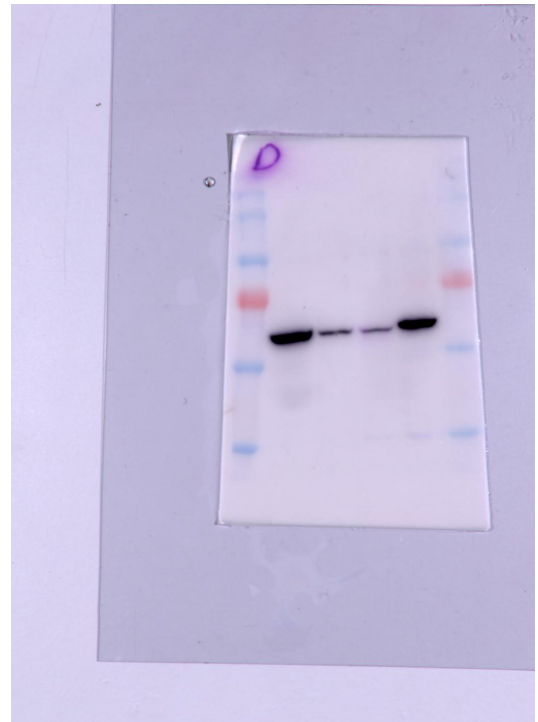

TfR

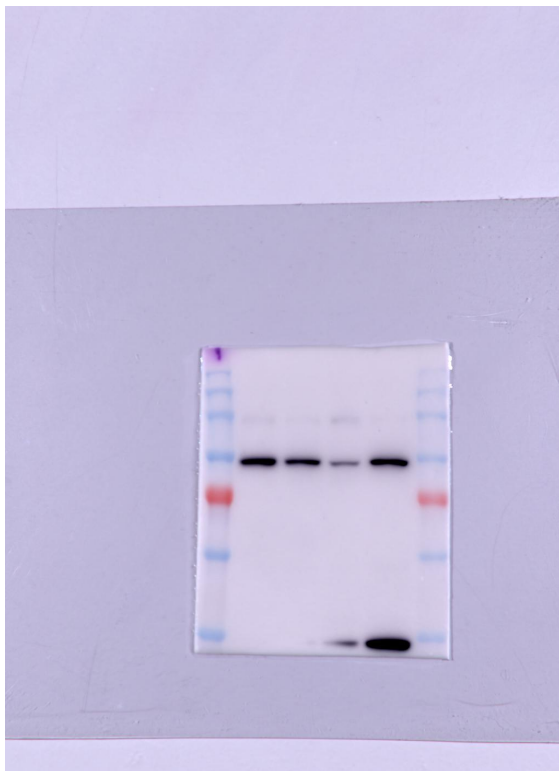

FtH

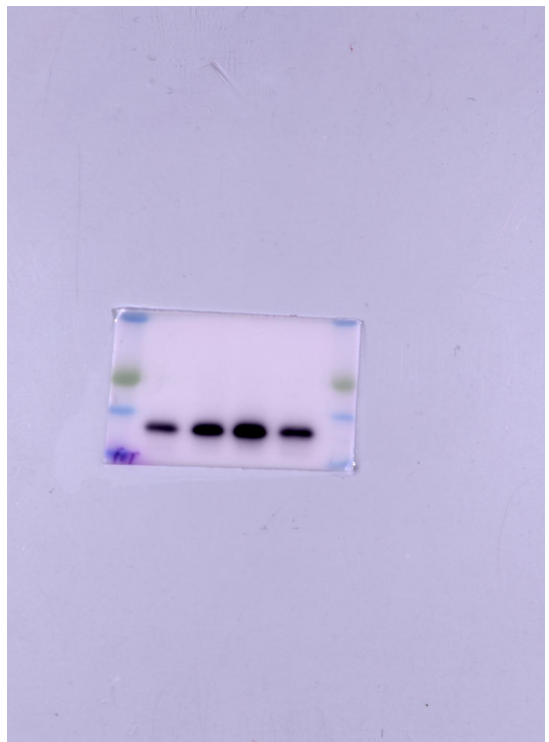

FtL

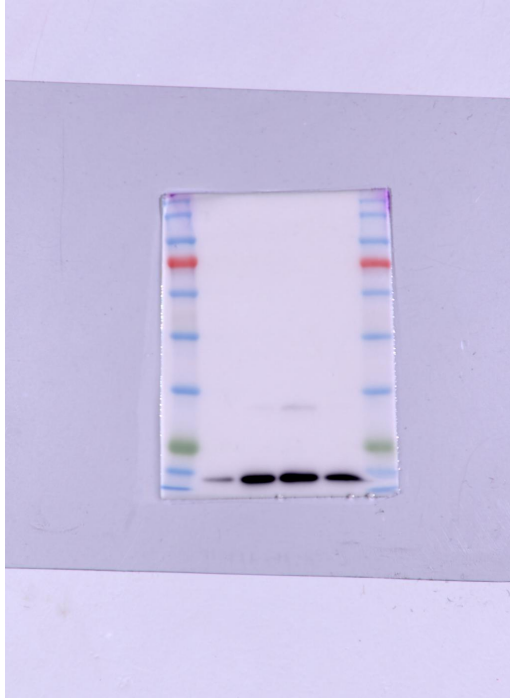

NCOA4

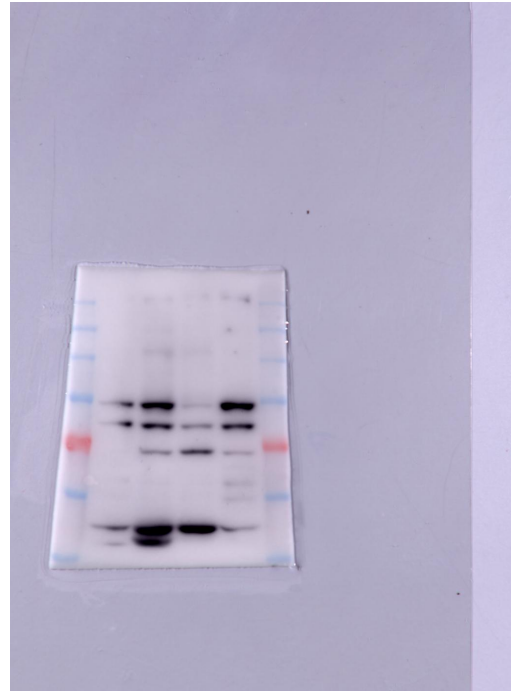

FPN

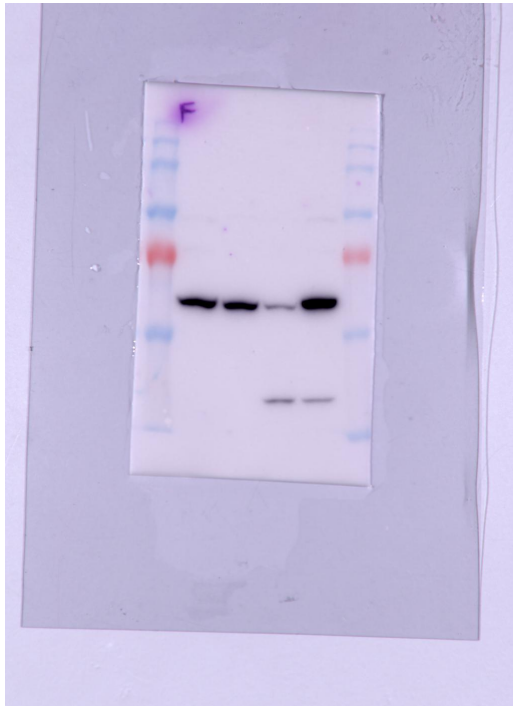

GAP

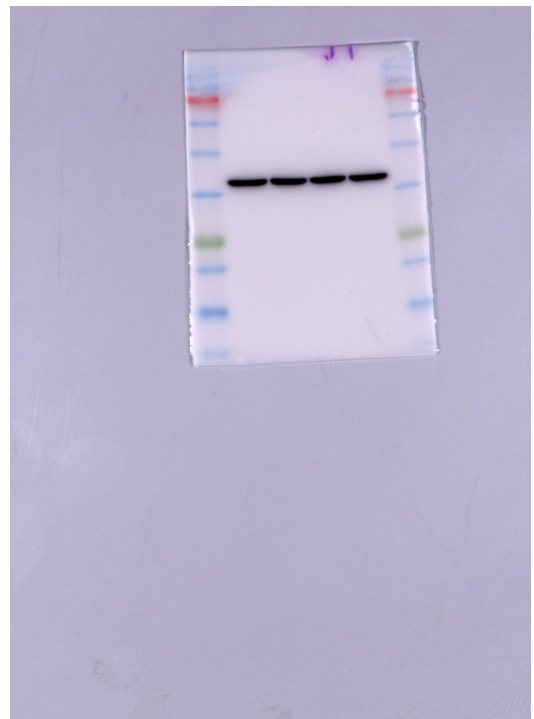

$\alpha$  -SMA

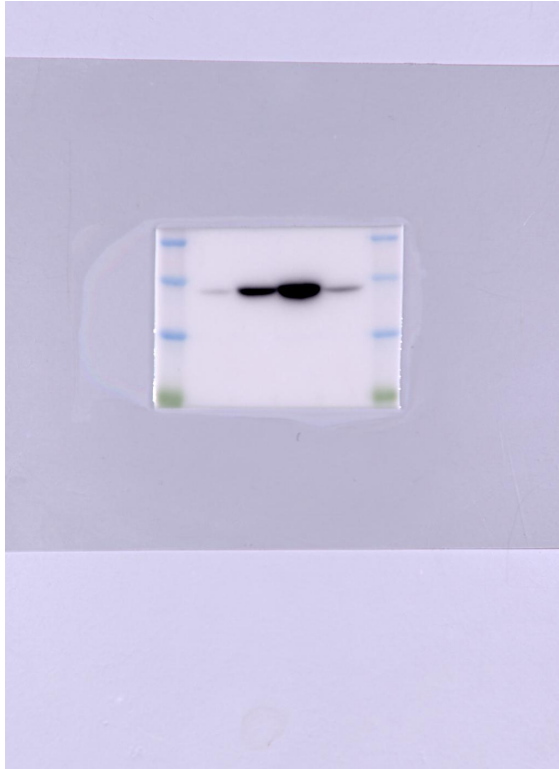

COL I

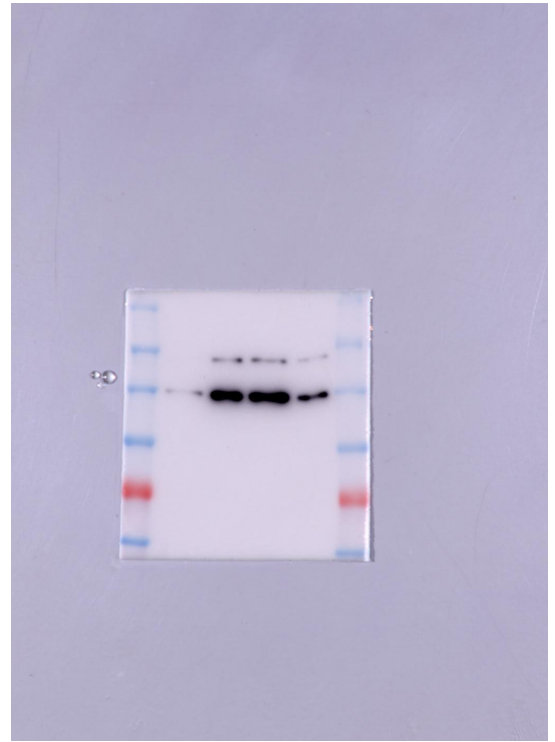

GAP

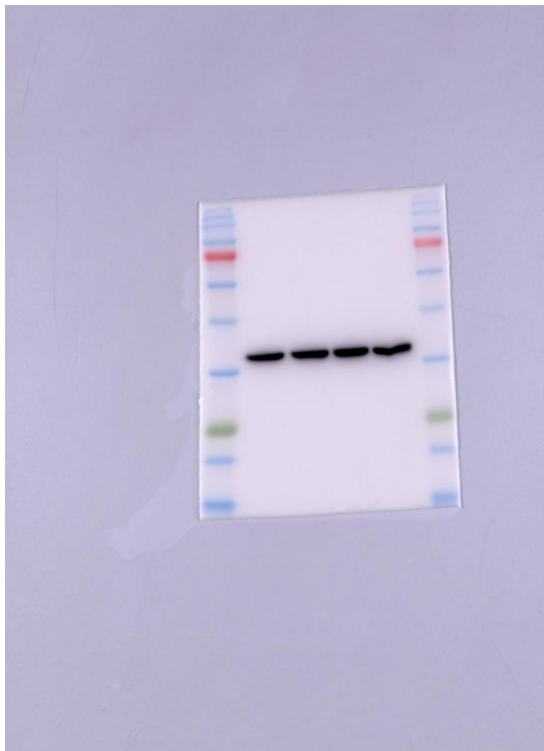

TGF-  $\beta$  1

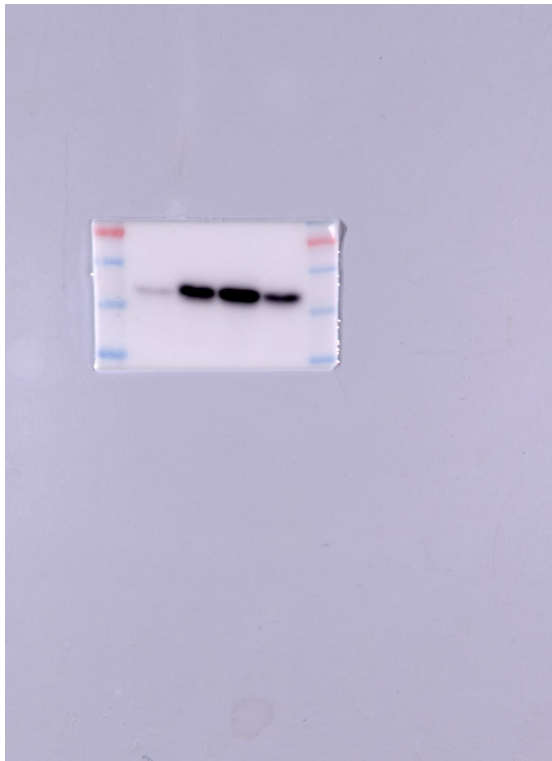

Smad3

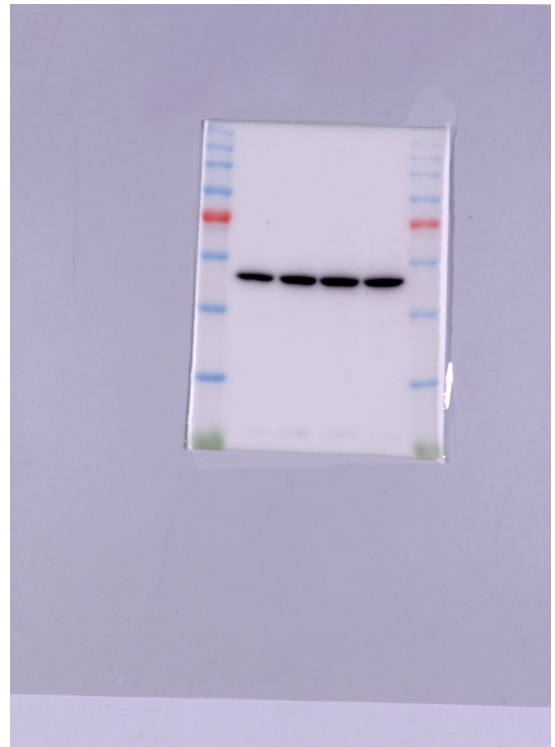

p-Smad3

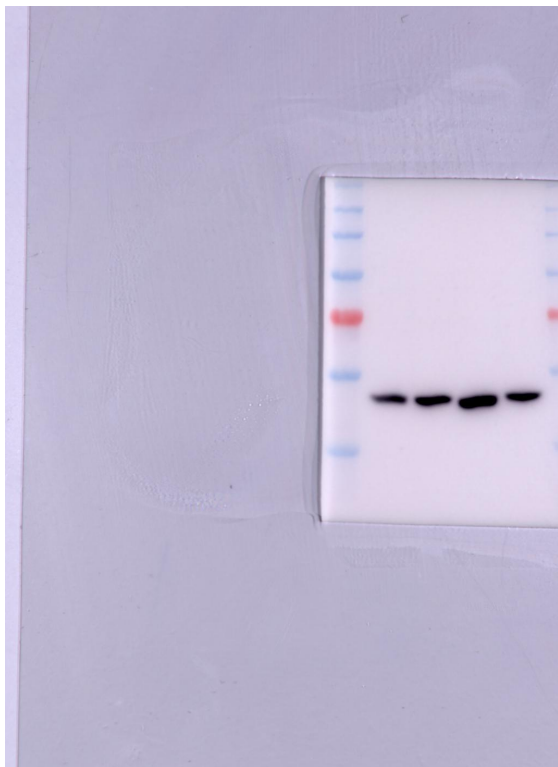

GAP

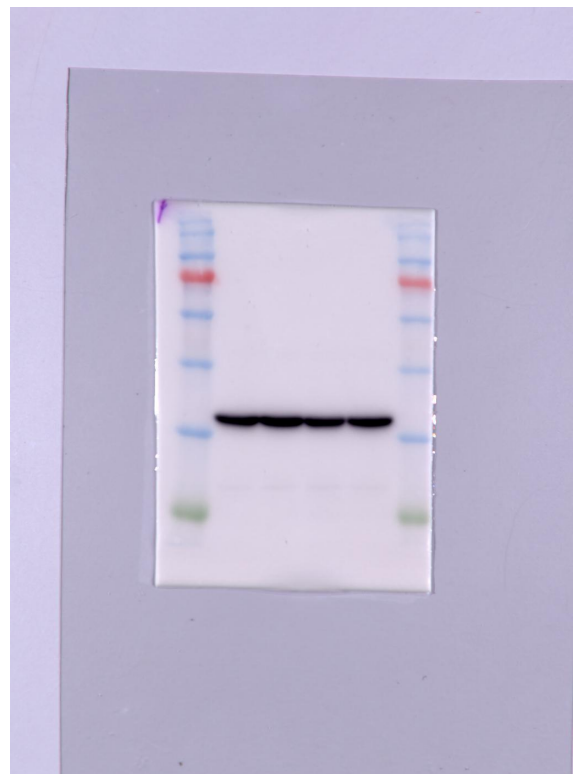

Supplement: 41420_2022_931_MOESM1_ESM.pdf [file 41420_2022_931_MOESM1_ESM.pdf]
